# Supplementary material
Source: MDPI journal article supplement (https://www.mdpi.com/2673-9976/26/1/112)
Supplement: s1 [file s1]

*Supplementary Materials*

# Bioactive Compounds and Antioxidant Activity of Selected Pumpkin Cultivars: Impact of Cooking Treatments <sup>†</sup>

Roxana E. González <sup>1,2,\*</sup>, María B. Botella <sup>2,3</sup> and Pamela Y. Quintas <sup>2,3</sup>

<sup>1</sup> Estación Experimental Agropecuaria La Consulta, Instituto Nacional de Tecnología Agropecuaria (INTA), Ex ruta 40 km 96, La Consulta, Mendoza, 5567, Argentina

<sup>2</sup> Facultad de Ciencias Exactas y Naturales, Universidad Nacional de Cuyo, Padre J. Contreras 1300, Mendoza, 5500, Argentina; marenas@mendoza-conicet.gob.ar (M.B.B.); pquintas@mendoza-conicet.gob.ar (P.Y.Q.)

<sup>3</sup> Laboratorio de Química Analítica para Investigación y Desarrollo (QUIANID), Facultad de Ciencias Exactas y Naturales, Universidad Nacional de Cuyo / Instituto Interdisciplinario de Ciencias Básicas (ICB), CONICET UNCUIYO, Padre J. Contreras 1300, Mendoza, 5500, Argentina

\* Correspondence: gonzalez.roxana@inta.gob.ar or rgonzalezs@fcen.uncu.edu.ar

<sup>†</sup> Presented at the 4th International Electronic Conference on Foods, 15–30 October 2023; Available online: <https://foods2023.sciforum.net/>.

**Table S1.** Temperature and time for each cooking treatment.

| Cooking treatment | Conditions of processing |         |
|-------------------|--------------------------|---------|
|                   | Temperature              | Time    |
| Boiling           | 100 °C                   | 10 min. |
| Steaming          | 100 °C                   | 20 min. |
| Baking            | 180 °C                   | 10 min  |
| Microwaving       | 800 W                    | 5 min   |

**Table S2.** Phenolic compounds: flavanol, flavanones, flavonols and flavonones levels in samples of pumpkin exposed to different cooking treatments, expressed in  $\mu\text{g/g}$  fw (fresh weight). The values reported are the mean of three replicates along with their corresponding standard deviation.

| Cultivar        | Cooking methods  | Phenolic compounds ( $\mu\text{g/g}$ fw) |                                        |                 |                                   |                 |                        |
|-----------------|------------------|------------------------------------------|----------------------------------------|-----------------|-----------------------------------|-----------------|------------------------|
|                 |                  | Flavanol<br>Catechin                     | Flavanones<br>Naringenin      Apigenin |                 | Flavonols<br>Quercetin      Rutin |                 | Flavonones<br>Luteolin |
| Cuyano<br>INTA  | Raw              | 11.56 $\pm$ 0.20                         | 0.28 $\pm$ 0.01                        | 0.17 $\pm$ 0.00 | 1.08 $\pm$ 0.04                   | 0.23 $\pm$ 0.01 | 0.77 $\pm$ 0.05        |
|                 | Boiling          | 4.63 $\pm$ 0.38                          | 0.20 $\pm$ 0.00                        | 0.04 $\pm$ 0.00 | 1.35 $\pm$ 0.05                   | 0.51 $\pm$ 0.03 | 0.34 $\pm$ 0.02        |
|                 | Baking           | 0.69 $\pm$ 0.10                          | 2.02 $\pm$ 0.02                        | 0.37 $\pm$ 0.01 | 1.09 $\pm$ 0.12                   | 0.34 $\pm$ 0.00 | 0.23 $\pm$ 0.01        |
|                 | Steaming         | 1.58 $\pm$ 0.05                          | 0.10 $\pm$ 0.02                        | 0.18 $\pm$ 0.01 | 1.66 $\pm$ 0.20                   | 0.34 $\pm$ 0.01 | 0.06 $\pm$ 0.01        |
|                 | Microwav-<br>ing | 2.16 $\pm$ 0.11                          | 0.16 $\pm$ 0.02                        | 1.46 $\pm$ 0.11 | 0.98 $\pm$ 0.01                   | 0.47 $\pm$ 0.03 | 0.57 $\pm$ 0.10        |
| Cokena<br>INTA  | Raw              | 10.81 $\pm$ 0.36                         | 8.81 $\pm$ 0.18                        | 0.77 $\pm$ 0.02 | 1.02 $\pm$ 0.16                   | 0.44 $\pm$ 0.00 | 15.04 $\pm$ 0.64       |
|                 | Boiling          | 11.04 $\pm$ 0.23                         | 0.62 $\pm$ 0.07                        | 2.16 $\pm$ 0.06 | 0.99 $\pm$ 0.04                   | 0.36 $\pm$ 0.01 | 5.16 $\pm$ 0.01        |
|                 | Baking           | 2.73 $\pm$ 0.14                          | 0.48 $\pm$ 0.05                        | 1.41 $\pm$ 0.18 | 1.39 $\pm$ 0.05                   | 0.36 $\pm$ 0.01 | 1.01 $\pm$ 0.06        |
|                 | Steaming         | 8.20 $\pm$ 0.01                          | 1.48 $\pm$ 0.17                        | 1.44 $\pm$ 0.09 | 0.98 $\pm$ 0.01                   | 0.64 $\pm$ 0.09 | 1.44 $\pm$ 0.12        |
|                 | Microwav-<br>ing | 8.20 $\pm$ 0.01                          | 1.48 $\pm$ 0.17                        | 1.44 $\pm$ 0.09 | 0.98 $\pm$ 0.01                   | 0.64 $\pm$ 0.09 | 1.44 $\pm$ 0.12        |
| Dorado<br>INTA  | Raw              | 1.01 $\pm$ 0.17                          | 1.02 $\pm$ 0.03                        | 1.19 $\pm$ 0.03 | 1.07 $\pm$ 0.00                   | 0.51 $\pm$ 0.04 | 0.28 $\pm$ 0.02        |
|                 | Boiling          | 3.98 $\pm$ 0.21                          | 0.85 $\pm$ 0.04                        | 1.07 $\pm$ 0.19 | < LOD <sup>a</sup>                | 0.31 $\pm$ 0.01 | 0.49 $\pm$ 0.03        |
|                 | Baking           | 2.74 $\pm$ 0.30                          | 3.76 $\pm$ 0.71                        | 0.48 $\pm$ 0.02 | 0.42 $\pm$ 0.08                   | 0.52 $\pm$ 0.07 | 2.65 $\pm$ 0.35        |
|                 | Steaming         | 0.79 $\pm$ 0.02                          | 2.32 $\pm$ 0.17                        | 1.13 $\pm$ 0.06 | 0.54 $\pm$ 0.09                   | 0.35 $\pm$ 0.00 | 2.15 $\pm$ 0.00        |
|                 | Microwav-<br>ing | 2.10 $\pm$ 0.12                          | 0.03 $\pm$ 0.00                        | 0.42 $\pm$ 0.05 | 0.81 $\pm$ 0.11                   | 0.37 $\pm$ 0.08 | 1.12 $\pm$ 0.11        |
| Paquito<br>INTA | Raw              | 0.14 $\pm$ 0.02                          | 0.58 $\pm$ 0.13                        | 2.27 $\pm$ 0.06 | 0.42 $\pm$ 0.00                   | 0.42 $\pm$ 0.01 | 0.95 $\pm$ 0.08        |
|                 | Boiling          | 12.43 $\pm$ 0.05                         | 65.59 $\pm$ 0.22                       | 0.14 $\pm$ 0.01 | 0.82 $\pm$ 0.01                   | 0.35 $\pm$ 0.01 | 90.83 $\pm$ 0.65       |
|                 | Baking           | 4.37 $\pm$ 0.71                          | 1.05 $\pm$ 0.03                        | 1.23 $\pm$ 0.19 | 0.74 $\pm$ 0.07                   | 0.57 $\pm$ 0.04 | 0.10 $\pm$ 0.02        |
|                 | Steaming         | 3.29 $\pm$ 0.07                          | 2.15 $\pm$ 0.06                        | 0.62 $\pm$ 0.00 | 1.36 $\pm$ 0.03                   | 0.46 $\pm$ 0.01 | 1.88 $\pm$ 0.05        |
|                 | Microwav-<br>ing | 15.08 $\pm$ 1.32                         | 1.04 $\pm$ 0.16                        | 1.06 $\pm$ 0.04 | 1.48 $\pm$ 0.01                   | 0.37 $\pm$ 0.00 | 1.18 $\pm$ 0.04        |

<sup>a</sup>LOD: Limits of detection.

**Table S3.** Phenolic compounds: hydrocinnamic acid levels in samples of pumpkin exposed to different cooking treatments, expressed in  $\mu\text{g/g}$  fw (fresh weight). The values reported are the mean of three replicates along with their corresponding standard deviation.

| Cultivar     | Cooking methods | Phenolic compounds ( $\mu\text{g/g}$ fw) |                 |                 |                 |                 |                  |                    |
|--------------|-----------------|------------------------------------------|-----------------|-----------------|-----------------|-----------------|------------------|--------------------|
|              |                 | Hydrocinnamic acids                      |                 |                 |                 |                 | Chlorogenic acid | Rosmarinic acid    |
|              |                 | Caffeic acid                             | Ferulic acid    | Sinapic acid    | Cumaric acid    | Cinnamic acid   |                  |                    |
| Cuyano INTA  | Raw             | $0.23 \pm 0.01$                          | $0.33 \pm 0.02$ | $6.32 \pm 0.74$ | $0.22 \pm 0.00$ | $0.05 \pm 0.00$ | $2.77 \pm 0.15$  | $0.00 \pm 0.00$    |
|              | Boiling         | $0.27 \pm 0.01$                          | $0.35 \pm 0.02$ | $0.35 \pm 0.01$ | $0.28 \pm 0.02$ | $0.42 \pm 0.00$ | $0.19 \pm 0.02$  | $22.02 \pm 1.15$   |
|              | Baking          | $0.19 \pm 0.00$                          | $1.59 \pm 0.10$ | $2.79 \pm 0.42$ | $0.22 \pm 0.00$ | $0.42 \pm 0.01$ | $0.45 \pm 0.07$  | $0.00 \pm 0.00$    |
|              | Steaming        | $0.20 \pm 0.01$                          | $1.37 \pm 0.00$ | $2.21 \pm 0.31$ | $0.33 \pm 0.00$ | $0.07 \pm 0.00$ | $0.52 \pm 0.10$  | $0.00 \pm 0.00$    |
|              | Microwaving     | $1.53 \pm 0.18$                          | $0.19 \pm 0.02$ | $5.62 \pm 0.21$ | $0.31 \pm 0.00$ | $0.45 \pm 0.02$ | $0.27 \pm 0.03$  | $1.09 \pm 0.11$    |
| Cokena INTA  | Raw             | $0.14 \pm 0.02$                          | $0.08 \pm 0.00$ | $6.40 \pm 0.19$ | $0.15 \pm 0.02$ | $0.28 \pm 0.05$ | $0.20 \pm 0.00$  | $5.07 \pm 0.16$    |
|              | Boiling         | $0.14 \pm 0.01$                          | $3.65 \pm 0.04$ | $3.10 \pm 0.13$ | $0.24 \pm 0.00$ | $1.34 \pm 0.02$ | $0.09 \pm 0.00$  | $10.85 \pm 0.85$   |
|              | Baking          | $0.16 \pm 0.01$                          | $0.02 \pm 0.00$ | $6.60 \pm 0.05$ | $0.15 \pm 0.02$ | $0.24 \pm 0.02$ | $0.19 \pm 0.00$  | < LOD <sup>a</sup> |
|              | Steaming        | $0.14 \pm 0.02$                          | $0.07 \pm 0.01$ | $5.91 \pm 0.04$ | $5.08 \pm 0.04$ | $0.50 \pm 0.15$ | $0.27 \pm 0.01$  | $6.35 \pm 0.00$    |
|              | Microwaving     | $0.14 \pm 0.02$                          | $0.07 \pm 0.01$ | $5.91 \pm 0.04$ | $5.08 \pm 0.04$ | $0.50 \pm 0.15$ | $0.27 \pm 0.01$  | $6.35 \pm 0.00$    |
| Dorado INTA  | Raw             | $0.26 \pm 0.01$                          | $3.93 \pm 0.00$ | $6.01 \pm 0.00$ | $0.19 \pm 0.01$ | $0.55 \pm 0.08$ | $0.96 \pm 0.03$  | $3.80 \pm 0.29$    |
|              | Boiling         | $0.16 \pm 0.04$                          | $0.21 \pm 0.01$ | $2.50 \pm 0.05$ | $0.19 \pm 0.00$ | $0.47 \pm 0.00$ | $0.41 \pm 0.02$  | < LOD <sup>a</sup> |
|              | Baking          | $0.56 \pm 0.06$                          | $0.68 \pm 0.30$ | $1.39 \pm 0.32$ | $0.33 \pm 0.05$ | $0.37 \pm 0.06$ | $0.11 \pm 0.03$  | < LOD <sup>a</sup> |
|              | Steaming        | $0.21 \pm 0.00$                          | $0.28 \pm 0.00$ | $2.70 \pm 0.01$ | $0.13 \pm 0.00$ | $0.48 \pm 0.00$ | $0.29 \pm 0.00$  | < LOD <sup>a</sup> |
|              | Microwaving     | $0.17 \pm 0.03$                          | $0.31 \pm 0.03$ | $1.68 \pm 0.03$ | $0.92 \pm 0.14$ | $0.20 \pm 0.02$ | $0.47 \pm 0.03$  | < LOD <sup>a</sup> |
| Paquito INTA | Raw             | $1.79 \pm 0.04$                          | $1.94 \pm 0.00$ | $3.06 \pm 0.01$ | $0.17 \pm 0.01$ | $0.43 \pm 0.00$ | $0.14 \pm 0.01$  | $0.57 \pm 0.02$    |
|              | Boiling         | $0.53 \pm 0.04$                          | $0.17 \pm 0.01$ | $2.06 \pm 0.13$ | $0.27 \pm 0.01$ | $0.57 \pm 0.08$ | $0.25 \pm 0.03$  | $0.13 \pm 0.00$    |
|              | Baking          | $0.26 \pm 0.02$                          | $0.21 \pm 0.01$ | $0.51 \pm 0.00$ | $0.30 \pm 0.02$ | $0.51 \pm 0.03$ | $0.12 \pm 0.01$  | < LOD <sup>a</sup> |
|              | Steaming        | $0.17 \pm 0.00$                          | $0.18 \pm 0.01$ | $1.09 \pm 0.10$ | $0.17 \pm 0.01$ | $0.44 \pm 0.01$ | $0.12 \pm 0.00$  | < LOD <sup>a</sup> |
|              | Microwaving     | $0.08 \pm 0.01$                          | $0.25 \pm 0.01$ | $2.08 \pm 0.02$ | $4.16 \pm 0.05$ | $0.37 \pm 0.00$ | $0.26 \pm 0.01$  | $0.19 \pm 0.01$    |

<sup>a</sup>LOD: Limits of detection.

**Table S4.** Phenolic compounds: hydroxybenzoic and phenyl alcohol levels in samples of pumpkin exposed to different cooking treatments, expressed in  $\mu\text{g/g}$  fw (fresh weight). The values reported are the mean of three replicates along with their corresponding standard deviation.

| Cultivar     | Cooking methods | Phenolic compounds ( $\mu\text{g/g}$ fw) |                 |
|--------------|-----------------|------------------------------------------|-----------------|
|              |                 | Hydroxybenzoic acids                     | Phenyl alcohol  |
|              |                 | Vanillic acid                            | Tyrosol         |
| Cuyano INTA  | Raw             | < LOQ <sup>b</sup>                       | 0.28 $\pm$ 0.01 |
|              | Boiling         | 0.35 $\pm$ 0.02                          | 0.20 $\pm$ 0.00 |
|              | Baking          | 0.06 $\pm$ 0.03                          | 1.16 $\pm$ 0.03 |
|              | Steaming        | < LOQ <sup>b</sup>                       | 0.10 $\pm$ 0.02 |
|              | Microwaving     | 5.16 $\pm$ 0.13                          | 0.16 $\pm$ 0.02 |
| Cokena INTA  | Raw             | < LOQ <sup>b</sup>                       | 0.09 $\pm$ 0.03 |
|              | Boiling         | 6.29 $\pm$ 0.05                          | 0.62 $\pm$ 0.07 |
|              | Baking          | 1.04 $\pm$ 0.01                          | 0.48 $\pm$ 0.05 |
|              | Steaming        | < LOQ <sup>b</sup>                       | 1.06 $\pm$ 0.16 |
|              | Microwaving     | < LOQ <sup>b</sup>                       | 1.06 $\pm$ 0.16 |
| Dorado INTA  | Raw             | 0.66 $\pm$ 0.00                          | 1.02 $\pm$ 0.03 |
|              | Boiling         | < LOQ <sup>b</sup>                       | 0.85 $\pm$ 0.04 |
|              | Baking          | 0.47 $\pm$ 0.01                          | 2.27 $\pm$ 0.47 |
|              | Steaming        | 4.04 $\pm$ 0.04                          | 0.65 $\pm$ 0.15 |
|              | Microwaving     | < LOQ <sup>b</sup>                       | 0.03 $\pm$ 0.00 |
| Paquito INTA | Raw             | 0.02 $\pm$ 0.00                          | 0.58 $\pm$ 0.13 |
|              | Boiling         | 0.26 $\pm$ 0.01                          | 0.82 $\pm$ 0.01 |
|              | Baking          | 0.06 $\pm$ 0.01                          | 1.05 $\pm$ 0.03 |
|              | Steaming        | < LOQ <sup>b</sup>                       | 0.50 $\pm$ 0.03 |
|              | Microwaving     | < LOQ <sup>b</sup>                       | 1.04 $\pm$ 0.16 |

<sup>b</sup>LOQ: Limits of quantification.

**Table S5.** Enantiomers D and L (Trp and Tyr) levels in samples of pumpkin exposed to different cooking treatments, expressed in  $\mu\text{g/g}$  fw (fresh weight). The values reported are the mean of three replicates along with their corresponding standard deviation.

| Cultivars    | Cooking treatment | L-Tyr          | D-Tyr              | D-Trp              | L-Trp              |
|--------------|-------------------|----------------|--------------------|--------------------|--------------------|
| Cuyano INTA  | Raw               | 196 $\pm$ 8    | < LOD <sup>a</sup> | 2.02 $\pm$ 5.28E-3 | 15.1 $\pm$ 0.1     |
|              | Boiling           | 121 $\pm$ 1    | < LOD <sup>a</sup> | 2.06 $\pm$ 3.33E-2 | 8.88 $\pm$ 0.2     |
|              | Steaming          | 216 $\pm$ 6    | < LOD <sup>a</sup> | 1.04 $\pm$ 1.77E-2 | 24.6 $\pm$ 6.6E-2  |
|              | Baking            | 224 $\pm$ 5    | < LOD <sup>a</sup> | 2.03 $\pm$ 5.38E-2 | 18.7 $\pm$ 7.2E-2  |
|              | Microwaving       | 77.9 $\pm$ 2.7 | < LOD <sup>a</sup> | < LOQ <sup>b</sup> | 5.11 $\pm$ 5.3E-2  |
| Cokena INTA  | Raw               | 224 $\pm$ 5    | < LOD <sup>a</sup> | < LOD <sup>a</sup> | 19.1 $\pm$ 0.1     |
|              | Boiling           | 177 $\pm$ 5    | < LOD <sup>a</sup> | 1.65 $\pm$ 3.41E-2 | 12.4 $\pm$ 4.6E-2  |
|              | Steaming          | 333 $\pm$ 2    | < LOD <sup>a</sup> | 2.54 $\pm$ 4.01E-2 | 30.0 $\pm$ 2.8E-2  |
|              | Baking            | 337 $\pm$ 5    | < LOD <sup>a</sup> | 2.00 $\pm$ 4.67E-2 | < LOQ <sup>b</sup> |
|              | Microwaving       | 339 $\pm$ 5    | < LOD <sup>a</sup> | 3.58 $\pm$ 7.34E-2 | 26.0 $\pm$ 4.4E-2  |
| Dorado INTA  | Raw               | 259 $\pm$ 2    | < LOD <sup>a</sup> | 4.08 $\pm$ 3.22E-2 | 14.0 $\pm$ 0.2     |
|              | Boiling           | 119 $\pm$ 4    | < LOD <sup>a</sup> | 0.98 $\pm$ 3.81E-2 | 11.9 $\pm$ 5.9E-2  |
|              | Steaming          | 204 $\pm$ 1    | < LOD <sup>a</sup> | < LOD <sup>a</sup> | 22.3 $\pm$ 9.9E-2  |
|              | Baking            | 95.5 $\pm$ 0.2 | < LOD <sup>a</sup> | 0.99 $\pm$ 2.79E-2 | 6.21 $\pm$ 7.69E-2 |
|              | Microwaving       | 445 $\pm$ 4    | < LOD <sup>a</sup> | 13.7 $\pm$ 9.5E-2  | 45.6 $\pm$ 0.2     |
| Paquito INTA | Raw               | 291 $\pm$ 11   | < LOD <sup>a</sup> | < LOQ <sup>b</sup> | 67.0 $\pm$ 1.0     |
|              | Boiling           | 414 $\pm$ 2    | < LOD <sup>a</sup> | 1.07 $\pm$ 6.59E-2 | 49.5 $\pm$ 3.7E-2  |
|              | Steaming          | 586 $\pm$ 5    | < LOD <sup>a</sup> | < LOD <sup>a</sup> | 64.1 $\pm$ 0.2     |
|              | Baking            | 583 $\pm$ 5    | < LOD <sup>a</sup> | 1.54 $\pm$ 2.19E-2 | 79.2 $\pm$ 4.0     |
|              | Microwaving       | 729 $\pm$ 29   | < LOD <sup>a</sup> | 1.21 $\pm$ 6.44E-2 | 86.8 $\pm$ 1.7     |

<sup>a</sup>LOD: Limits of detection; <sup>b</sup>LOQ: Limits of quantification.

**Table S6.** ANOVA table of Try and Trp variation due to cultivar, cooking treatment, and their interaction.

| <b>L-Tyr</b>               |     |               |         |          |         |
|----------------------------|-----|---------------|---------|----------|---------|
| Source                     | d.f | Sum of square |         | F value  | p-value |
| Cooking treatment          | 4   | 229555.46     | (11.1%) | 877.22   | <0.0001 |
| Cultivar                   | 3   | 1578183.62    | (76.2%) | 8041.1   | <0.0001 |
| Cooking treatment*Cultivar | 12  | 261154.04     | (12.6%) | 332.66   | <0.0001 |
| Error                      | 40  | 2616.86       | (0.1%)  |          |         |
| Total                      | 59  | 2071509.98    | (100%)  |          |         |
| <b>L-Trp</b>               |     |               |         |          |         |
| Source                     | d.f | Sum of square |         | F value  | p-value |
| Cooking treatment          | 4   | 2985.51       | (7.8%)  | 1970.48  | <0.0001 |
| Cultivar                   | 3   | 30643.01      | (79.7%) | 727.99   | <0.0001 |
| Cooking treatment*Cultivar | 12  | 4756.05       | (12.4%) | 9962.76  | <0.0001 |
| Error                      | 40  | 41.01         | (0.1%)  | 386.58   | <0.0001 |
| Total                      | 59  | 38425.57      | (100%)  |          |         |
| <b>D-Trp</b>               |     |               |         |          |         |
| Source                     | d.f | Sum of square |         | F value  | p-value |
| Cooking treatment          | 4   | 508.09        | (20.5%) | 17039.32 | <0.0001 |
| Cultivar                   | 3   | 104.28        | (16.7%) | 18502.62 | <0.0001 |
| Cooking treatment*Cultivar | 12  | 84.93         | (62.8%) | 17368.07 | <0.0001 |
| Error                      | 40  | 318.88        | (0.01%) | 17039.32 | <0.0001 |
| Total                      | 59  | 0.06          | (100%)  |          |         |
